# Supplementary material for: High Pretransplant BAFF Levels and B-cell Subset Polarized towards a Memory Phenotype as Predictive Biomarkers for Antibody-Mediated Rejection
Source: MDPI journal article supplement (doi:10.3390/ijms21030779), 2020-01-25
Supplement: s1 [file s1]

**Supplementary Table 2.** Immunophenotype for B cell subset identification

| B cell subset       | CD markers                        |
|---------------------|-----------------------------------|
| Follicular B        | CD19+CD10+CD20+CD21+CD5high       |
| Marginal zone       | CD19+CD20+CD21+CD24highCD38-      |
| Pre B1              | CD19+CD10+CD20-                   |
| Pre B2              | CD19+CD10+CD20+CD21+CD24+CD38high |
| Transitional B T1   | CD19+CD24+CD38+CD5high            |
| Transitional B T2   | CD19+CD24+CD38+CD5low             |
| Bm1                 | CD19+IgD+CD38-                    |
| Bm2                 | CD19+IgD+CD38+                    |
| Bm2'                | CD19+IgD+CD38high                 |
| Bm3Bm4              | CD19+IgD-CD38high                 |
| eBm5                | CD19+IgD-CD38+                    |
| Bm5                 | CD19+IgD-CD38-                    |
| Naïve               | CD19+IgD+CD27-                    |
| Unswitched-memory B | CD19+IgD+CD27+                    |
| Switched-memory B   | CD19+IgD-CD27+                    |
| Plasma cells        | CD19-CD20-CD27highCD38highCD138+  |
