# Supplementary material for: High Pretransplant BAFF Levels and B-cell Subset Polarized towards a Memory Phenotype as Predictive Biomarkers for Antibody-Mediated Rejection
Source: MDPI journal article supplement (doi:10.3390/ijms21030779), 2020-01-25
Supplement: s1 [file s1]

**Supplementary Table 3. Immunophenotype for T cell subset identification**

| <b>T cell subset</b> | <b>CD markers</b>     |
|----------------------|-----------------------|
| CD4 naïve            | CD3+CD4+CD62L+CD45RO- |
| CD4 central memory   | CD3+CD4+CD62L+CD45RO+ |
| CD4 effector memory  | CD3+CD4+CD62L-CD45RO+ |
| CD4 TEMRA            | CD3+CD4+CD62L-CD45RO- |
| CD8 naïve            | CD3+CD8+CD62L+CD45RO- |
| CD8 central memory   | CD3+CD8+CD62L+CD45RO+ |
| CD8 effector memory  | CD3+CD8+CD62L-CD45RO+ |
| CD8 TEMRA            | CD3+CD8+CD62L-CD45RO- |
