# Supplementary material for: High Pretransplant BAFF Levels and B-cell Subset Polarized towards a Memory Phenotype as Predictive Biomarkers for Antibody-Mediated Rejection
Source: MDPI journal article supplement (doi:10.3390/ijms21030779), 2020-01-25
Supplement: s1 [file s1]

**Supplementary Table 4.** Percentages of different B and T cell subpopulations before kidney transplantation in healthy subjects (n = 40), kidney transplant patients without clinical rejection (n = 87) and kidney transplant patients that developed antibody-mediated rejection (AbMR) (n = 11) during the first 12 months after kidney transplantation.

|                     | Healthy subjects<br>(n=40) | Non-clinical rejection<br>(n=87) | Clinical AbMR<br>(n=11) |
|---------------------|----------------------------|----------------------------------|-------------------------|
| Transitional B T2   | 4.87 (3.11-6.74)           | 1.34 (0.40-2.57)                 | 0.15 (0.09-0.92)        |
| Naïve B             | 60.77 (49.19-67.62)        | 59.33 (43.99-76.90)              | 27.30 (13.50-33.31)     |
| Unswitched-memory B | 16.36 (11.77-23.38)        | 10.08 (6.32-17.36)               | 6.25 (4.71-11.34)       |
| Switched-memory B   | 16.04 (12.85-21.07)        | 18.89 (9.66-27.32)               | 44.33 (9.26-59.36)      |
| Bm2                 | 45.13 (39.39-53.48)        | 51.99 (41.18-61.55)              | 21.63 (4.56-29.27)      |
| Bm2'                | 6.18 (4.35-9.44)           | 5.92 (3.37-10.55)                | 6.30 (2.06-11.36)       |
| Bm5                 | 11.17 (8.15-14.26)         | 13.28 (8.28-18.69)               | 8.04 (6.03-20.10)       |
| eBm5                | 9.38 (7.18-13.15)          | 8.83 (4.99-12.79)                | 9.85 (4.94-15.81)       |
| Naïve CD4           | 58.33 (39.66-66.58)        | 42.47 (23.46-59.70)              | 29.99 (15.49-38.78)     |
| TEMRA CD4           | 0.50 (0.26-1.11)           | 3.29 (1.40-7.78)                 | 12.90 (4.71-17.95)      |
| Naïve CD8           | 51.97 (36.14-61.56)        | 40.02 (26.48-57.31)              | 25.50 (9.30-38.18)      |
| TEMRA CD8           | 15.22 (9.32-30.77)         | 31.58 (21.73-53.34)              | 47.24 (34.38-62.85)     |

AbMR: antibody-mediated rejection
