# Supplementary material for: High Pretransplant BAFF Levels and B-cell Subset Polarized towards a Memory Phenotype as Predictive Biomarkers for Antibody-Mediated Rejection
Source: MDPI journal article supplement (doi:10.3390/ijms21030779), 2020-01-25
Supplement: s1 [file s1]

**Supplementary Table 1.** Demographic, clinical and immunological parameters of AbMR KT patients vs. non-rejection group

|                            | <b>Non-rejection (n=87)</b> | <b>AbMR (n=11)</b> | <b><i>p</i></b> |
|----------------------------|-----------------------------|--------------------|-----------------|
| Recipient age (years)      | 56 (43-63)                  | 51 (44-63)         | 0.875           |
| Recipient gender<br>(male) | 52 (59.8%)                  | 5 (45.5%)          | 0.364           |
| Etiology of ESRD:          |                             |                    |                 |
| Glomerular                 | 30 (34.5%)                  | 3 (27.3%)          | 0.634           |
| Diabetes mellitus          | 19 (21.8%)                  | 3 (27.3%)          | 0.684           |
| PKD                        | 15 (17.2%)                  | 1 (9.1%)           | 0.491           |
| Interstitial               | 6 (6.9%)                    | 2 (18.2%)          | 0.198           |
| Vascular                   | 6 (6.9%)                    | 2 (18.2%)          | 0.198           |
| Non-filiated               | 7 (8.0%)                    | 0                  |                 |
| Other causes               | 4 (4.6%)                    | 0                  |                 |
| Retransplantation          | 17 (19.5%)                  | 3 (27.3%)          | 0.549           |
| Hypersensitized<br>(>90%)  | 4 (4.6%)                    | 3 (27.3%)          | 0.006           |
| PreTx anti-HLA Ab          | 27 (31%)                    | 5 (45.5%)          | 0.337           |
| Donor age (years)          | 53 (44-62)                  | 55 (48-64)         | 0.408           |
| DGF                        | 16 (18.4%)                  | 7 (63.6%)          | 0.001           |
| CIT (hours)                | 16 (9-21)                   | 21 (21-23)         | 0.012           |
| Induction therapy:         |                             |                    |                 |
| Thymoglobulin              | 41 (47.1%)                  | 5 (45.5%)          | 0.917           |
| Basiliximab                | 19 (21.8%)                  | 5 (45.5%)          | 0.086           |
| Biopsy C4d+                | 0                           | 10 (90.9%)         |                 |
| Biopsy g+ptc ≥ 2           | 0                           | 10 (90.9%)         |                 |
| HLA-A Mismatches           | 1.18 (0.64)                 | 1.18 (0.60)        | 0.959           |
| HLA-B Mismatches           | 1.52 (0.63)                 | 1.36 (0.67)        | 0.418           |
| HLA-C Mismatches           | 1.37 (0.61)                 | 1.36 (0.67)        | 0.980           |
| HLA-DRB1<br>Mismatches     | 1.30 (0.68)                 | 1.36 (0.67)        | 0.786           |
| HLA-DQB1<br>Mismatches     | 1.05 (0.65)                 | 1.00 (0.89)        | 0.861           |

ESRD: end-stage renal disease; PKD: polycystic kidney disease; DGF: delayed graft function; CIT: cold ischemia time; AbMR: antibody-mediated rejection; PreTx: pre transplantation.
