# Supplementary material for: High Pretransplant BAFF Levels and B-cell Subset Polarized towards a Memory Phenotype as Predictive Biomarkers for Antibody-Mediated Rejection
Source: MDPI journal article supplement (doi:10.3390/ijms21030779), 2020-01-25
Supplement: s1 [file s1]

**Supplementary Table 5.** Percentages of different B and T cell subpopulations at 6 and 12 months after kidney transplantation in kidney transplant patients without subclinical rejection (n = 38) and kidney transplant patients that presented subclinical cellular (n = 8) and subclinical antibody-mediated rejection (AbMR) (n = 5) in the surveillance biopsy performed at 1 year after kidney transplantation.

|                            | Non-subclinical rejection (n=38) | Subclinical cellular rejection (n=8) | Subclinical AbMR (n=5) |
|----------------------------|----------------------------------|--------------------------------------|------------------------|
| <b>Transitional B T2</b>   |                                  |                                      |                        |
| 6 months                   | 1.19 (0.64-2.34)                 | 1.07 (0.16-1.42)                     | 0.22 (0.09-0.58)       |
| 12 months                  | 1.58 (0.80-2.75)                 | 1.16 (0.48-1.40)                     | 0.48 (0.29-0.50)       |
| <b>Naïve B</b>             |                                  |                                      |                        |
| 6 months                   | 59.67 (31.74-72.42)              | 46.15 (25.79-59.24)                  | 66.02 (24.45-79.29)    |
| 12 months                  | 64.43 (47.05-77.16)              | 70.71 (38.78-72.39)                  | 30.27 (23.62-54.71)    |
| <b>Unswitched-memory B</b> |                                  |                                      |                        |
| 6 months                   | 10.27 (6.51-15.29)               | 9.54 (7.43-12.92)                    | 6.17 (1.51-13.92)      |
| 12 months                  | 13.01 (8.95-17.41)               | 16.54 (7.31-19.82)                   | 6.32 (4.69-11.20)      |
| <b>Switched-memory B</b>   |                                  |                                      |                        |
| 6 months                   | 12.34 (5.88-16.92)               | 24.23 (15.48-29.69)                  | 7.87 (3.62-25.56)      |
| 12 months                  | 13.43 (6.89-20.80)               | 22.87 (11.24-34.62)                  | 42.61 (22.89-48.56)    |
| <b>Bm2</b>                 |                                  |                                      |                        |
| 6 months                   | 45.75 (25.91-57.25)              | 41.77 (13.63-57.04)                  | 48.78 (27.84-71.28)    |
| 12 months                  | 47.95 (34.68-57.16)              | 36.78 (21.11-67.18)                  | 30.14 (27.32-58.36)    |
| <b>Bm2'</b>                |                                  |                                      |                        |
| 6 months                   | 3.88 (1.92-10.47)                | 4.31 (2.96-4.78)                     | 1.61 (0.46-5.02)       |
| 12 months                  | 4.75 (2.65-11.42)                | 2.63 (1.49-7.39)                     | 0.71 (0.46-9.36)       |
| <b>Bm5</b>                 |                                  |                                      |                        |
| 6 months                   | 8.91 (4.19-19.30)                | 17.25 (8.18-28.47)                   | 13.03 (8.54-60.03)     |
| 12 months                  | 8.43 (6.29-12.10)                | 19.65 (7.03-43.96)                   | 41.00 (31.27-48.65)    |
| <b>eBm5</b>                |                                  |                                      |                        |
| 6 months                   | 9.39 (5.23-11.58)                | 15.30 (9.62-19.09)                   | 7.82 (3.30-8.29)       |
| 12 months                  | 8.23 (5.69-10.53)                | 13.31 (7.61-16.09)                   | 17.47 (7.95-23.82)     |
| <b>Naïve CD4</b>           |                                  |                                      |                        |
| 6 months                   | 48.39 (18.11-60.87)              | 19.37 (4.95-63.95)                   | 33.17 (11.82-50.45)    |
| 12 months                  | 34.28 (15.51-52.40)              | 28.63 (15.99-55.20)                  | 40.08 (18.73-61.18)    |
| <b>TEMRA CD4</b>           |                                  |                                      |                        |
| 6 months                   | 2.04 (1.07-5.81)                 | 4.25 (1.02-7.08)                     | 12.91 (4.93-19.88)     |
| 12 months                  | 2.10 (1.02-7.57)                 | 3.31 (2.24-10.79)                    | 3.50 (1.18-8.09)       |
| <b>Naïve CD8</b>           |                                  |                                      |                        |
| 6 months                   | 30.14 (21.24-48.69)              | 20.54 (13.25-56.89)                  | 24.61 (11.58-29.92)    |
| 12 months                  | 32.46 (19.84-44.24)              | 46.18 (13.87-60.38)                  | 37.91 (22.35-42.98)    |
| <b>TEMRA CD8</b>           |                                  |                                      |                        |
| 6 months                   | 46.79 (28.49-59.73)              | 43.44 (19.65-74.60)                  | 54.19 (51.36-66.72)    |
| 12 months                  | 48.20 (27.29-65.30)              | 40.29 (28.71-72.59)                  | 46.27 (41.52-58.90)    |

AbMR: antibody-mediated rejection
